# Supplementary material for: Influence of Environmental Factors on Some Biochemical and Physiological Indicators in Grapevine from Copou Vineyard, Iasi, Romania
Source: MDPI journal article supplement (doi:10.3390/agronomy13030886), 2023-03-16
Supplement: s1 [file s1]

**Table S1.** Pearson correlations between photosynthetic parameters for Gelu variety in the first year.

|                      | ANT       | CCI65     | CCI75     | CCI89    | PAR65     | PAR75      | PAR89  | T <sub>leaf</sub> 65 | T <sub>leaf</sub> 75 | T <sub>leaf</sub> 89 | T <sub>ext</sub> 65 | T <sub>ext</sub> 75 | T <sub>ext</sub> 89 | CO <sub>2</sub> 65 | CO <sub>2</sub> 75 | CO <sub>2</sub> 89 | WUE 65 | WUE 75 | WUE 89 |
|----------------------|-----------|-----------|-----------|----------|-----------|------------|--------|----------------------|----------------------|----------------------|---------------------|---------------------|---------------------|--------------------|--------------------|--------------------|--------|--------|--------|
| ANT                  | 1         |           |           |          |           |            |        |                      |                      |                      |                     |                     |                     |                    |                    |                    |        |        |        |
| CCI65                | 0.123     | 1         |           |          |           |            |        |                      |                      |                      |                     |                     |                     |                    |                    |                    |        |        |        |
| CCI75                | -0.292    | -0.985    | 1         |          |           |            |        |                      |                      |                      |                     |                     |                     |                    |                    |                    |        |        |        |
| CCI89                | 0.217     | 0.995     | -0.997(*) | 1        |           |            |        |                      |                      |                      |                     |                     |                     |                    |                    |                    |        |        |        |
| PAR65                | 0.415     | 0.954     | -0.991    | 0.978    | 1         |            |        |                      |                      |                      |                     |                     |                     |                    |                    |                    |        |        |        |
| PAR75                | -0.460    | -0.938    | 0.983     | -0.967   | -0.999(*) | 1          |        |                      |                      |                      |                     |                     |                     |                    |                    |                    |        |        |        |
| PAR89                | -0.714    | 0.607     | -0.461    | 0.528    | 0.340     | -0.293     | 1      |                      |                      |                      |                     |                     |                     |                    |                    |                    |        |        |        |
| T <sub>leaf</sub> 65 | 0.470     | 0.934     | -0.981    | 0.964    | 0.998(*)  | -1.000(**) | 0.282  | 1                    |                      |                      |                     |                     |                     |                    |                    |                    |        |        |        |
| T <sub>leaf</sub> 75 | 0.562     | 0.890     | -0.955    | 0.929    | 0.986     | -0.993     | 0.177  | 0.994                | 1                    |                      |                     |                     |                     |                    |                    |                    |        |        |        |
| T <sub>leaf</sub> 89 | -0.358    | -0.971    | 0.998(*)  | -0.989   | -0.998(*) | 0.994      | -0.398 | -0.992               | -0.973               | 1                    |                     |                     |                     |                    |                    |                    |        |        |        |
| T <sub>ext</sub> 65  | 0.999(*)  | 0.075     | -0.245    | 0.170    | 0.371     | -0.417     | -0.747 | 0.427                | 0.522                | -0.312               | 1                   |                     |                     |                    |                    |                    |        |        |        |
| T <sub>ext</sub> 75  | 0.409     | -0.855    | 0.754     | -0.802   | -0.660    | 0.622      | -0.931 | -0.613               | -0.525               | 0.706                | 0.452               | 1                   |                     |                    |                    |                    |        |        |        |
| T <sub>ext</sub> 89  | 0.082     | 0.999(*)  | -0.977    | 0.991    | 0.941     | -0.923     | 0.639  | 0.918                | 0.870                | -0.960               | 0.034               | -0.876              | 1                   |                    |                    |                    |        |        |        |
| CO <sub>2</sub> 65   | 0.123     | 1.000(**) | -0.985    | 0.995    | 0.954     | -0.938     | 0.607  | 0.934                | 0.890                | -0.971               | 0.075               | -0.855              | 0.999(*)            | 1                  |                    |                    |        |        |        |
| CO <sub>2</sub> 75   | 1.000(**) | 0.127     | -0.296    | 0.221    | 0.419     | -0.464     | -0.711 | 0.474                | 0.566                | -0.362               | 0.999(*)            | 0.405               | 0.086               | 0.127              | 1                  |                    |        |        |        |
| CO <sub>2</sub> 89   | -0.789    | -0.707    | 0.818     | -0.771   | -0.887    | 0.909      | 0.134  | -0.913               | -0.952               | 0.856                | -0.759              | 0.238               | -0.677              | -0.707             | -0.792             | 1                  |        |        |        |
| WUE 65               | 0.690     | 0.803     | -0.893    | 0.856    | 0.945     | -0.960     | 0.013  | 0.963                | 0.986                | -0.923               | 0.655               | -0.378              | 0.778               | 0.803              | 0.693              | -0.989             | 1      |        |        |
| WUE 75               | 0.236     | 0.993     | -0.998(*) | 1.000(*) | 0.982     | -0.971     | 0.512  | 0.969                | 0.936                | -0.992               | 0.189               | -0.790              | 0.988               | 0.993              | 0.240              | -0.783             | 0.866  | 1      |        |
| WUE 89               | -0.282    | 0.918     | -0.836    | 0.875    | 0.756     | -0.722     | 0.873  | 0.714                | 0.635                | -0.795               | -0.327              | -0.991              | 0.933               | 0.918              | -0.277             | -0.367             | 0.500  | 0.866  | 1      |

\*. Correlation is significant at the 0.05 level (2-tailed).

\*\*. Correlation is significant at the 0.01 level (2-tailed).

In blue – positive correlations

In red – negative correlations

**Table S2.** Pearson correlations between photosynthetic parameters for Moldova variety in the first year.

|                      | ANT          | CCI65            | CCI75         | CCI89         | PAR65         | PAR75           | PAR89  | T <sub>leaf</sub> 65 | T <sub>leaf</sub> 75 | T <sub>leaf</sub> 89 | T <sub>ext</sub> 65 | T <sub>ext</sub> 75 | T <sub>ext</sub> 89 | CO <sub>2</sub> 65 | CO <sub>2</sub> 75 | CO <sub>2</sub> 89 | WUE 65   | WUE 75 | WUE 89 |
|----------------------|--------------|------------------|---------------|---------------|---------------|-----------------|--------|----------------------|----------------------|----------------------|---------------------|---------------------|---------------------|--------------------|--------------------|--------------------|----------|--------|--------|
| ANT                  | 1            |                  |               |               |               |                 |        |                      |                      |                      |                     |                     |                     |                    |                    |                    |          |        |        |
| CCI65                | 0.415        | 1                |               |               |               |                 |        |                      |                      |                      |                     |                     |                     |                    |                    |                    |          |        |        |
| CCI75                | -0.441       | -1.000(*)        | 1             |               |               |                 |        |                      |                      |                      |                     |                     |                     |                    |                    |                    |          |        |        |
| CCI89                | -0.555       | -0.987           | 0.991         | 1             |               |                 |        |                      |                      |                      |                     |                     |                     |                    |                    |                    |          |        |        |
| PAR65                | -0.462       | <b>-0.999(*)</b> | 1.000(*)      | 0.994         | 1             |                 |        |                      |                      |                      |                     |                     |                     |                    |                    |                    |          |        |        |
| PAR75                | -0.940       | -0.701           | <b>0.721</b>  | 0.806         | 0.737         | 1               |        |                      |                      |                      |                     |                     |                     |                    |                    |                    |          |        |        |
| PAR89                | -0.974       | -0.610           | 0.633         | <b>0.729</b>  | 0.651         | 0.993           | 1      |                      |                      |                      |                     |                     |                     |                    |                    |                    |          |        |        |
| T <sub>leaf</sub> 65 | -0.170       | <b>0.826</b>     | -0.809        | -0.726        | <b>-0.795</b> | -0.177          | -0.057 | 1                    |                      |                      |                     |                     |                     |                    |                    |                    |          |        |        |
| T <sub>leaf</sub> 75 | -0.435       | 0.639            | <b>-0.616</b> | -0.508        | -0.597        | 0.101           | 0.220  | 0.961                | 1                    |                      |                     |                     |                     |                    |                    |                    |          |        |        |
| T <sub>leaf</sub> 89 | -0.483       | 0.596            | -0.573        | <b>-0.460</b> | -0.553        | 0.155           | 0.273  | 0.945                | 0.999(*)             | 1                    |                     |                     |                     |                    |                    |                    |          |        |        |
| T <sub>ext</sub> 65  | <b>0.472</b> | <b>-0.606</b>    | 0.583         | 0.471         | <b>0.564</b>  | -0.142          | -0.261 | <b>-0.949</b>        | -0.999(*)            | -1.000(**)           | 1                   |                     |                     |                    |                    |                    |          |        |        |
| T <sub>ext</sub> 75  | -0.934       | -0.712           | <b>0.732</b>  | 0.815         | 0.748         | <b>1.000(*)</b> | 0.991  | -0.193               | 0.085                | 0.139                | -0.126              | 1                   |                     |                    |                    |                    |          |        |        |
| T <sub>ext</sub> 89  | -0.581       | 0.500            | -0.475        | <b>-0.355</b> | -0.454        | 0.267           | 0.381  | 0.901                | 0.986                | <b>0.993</b>         | -0.992              | 0.251               | 1                   |                    |                    |                    |          |        |        |
| CO <sub>2</sub> 65   | 0.208        | <b>0.976</b>     | -0.970        | -0.929        | <b>-0.964</b> | -0.530          | -0.424 | <b>0.929</b>         | 0.790                | 0.756                | <b>-0.764</b>       | -0.543              | 0.676               | 1                  |                    |                    |          |        |        |
| CO <sub>2</sub> 75   | 0.278        | -0.759           | <b>0.740</b>  | 0.645         | 0.724         | 0.067           | -0.053 | -0.994               | <b>-0.986</b>        | -0.975               | 0.978               | 0.083               | -0.944              | -0.882             | 1                  |                    |          |        |        |
| CO <sub>2</sub> 89   | 0.455        | -0.622           | 0.599         | <b>0.489</b>  | 0.580         | -0.123          | -0.241 | -0.955               | -1.000(*)            | <b>-0.999(*)</b>     | 1.000(*)            | -0.107              | <b>-0.989</b>       | -0.777             | 0.982              | 1                  |          |        |        |
| WUE 65               | 0.235        | <b>0.982</b>     | -0.976        | -0.939        | <b>-0.971</b> | -0.554          | -0.449 | <b>0.918</b>         | 0.772                | 0.737                | <b>-0.746</b>       | -0.567              | 0.655               | <b>1.000(*)</b>    | -0.868             | -0.759             | 1        |        |        |
| WUE 75               | 0.213        | 0.977            | <b>-0.971</b> | -0.931        | -0.965        | <b>-0.534</b>   | -0.429 | 0.927                | <b>0.787</b>         | 0.752                | -0.761              | <b>-0.548</b>       | 0.672               | 1.000(**)          | <b>-0.879</b>      | -0.773             | 1.000(*) | 1      |        |
| WUE 89               | -0.304       | 0.741            | -0.721        | <b>-0.624</b> | -0.704        | -0.040          | 0.081  | 0.990                | 0.990                | <b>0.981</b>         | -0.983              | -0.056              | <b>0.952</b>        | 0.869              | -1.000(*)          | <b>-0.987</b>      | 0.854    | 0.866  | 1      |

\*. Correlation is significant at the 0.05 level (2-tailed).

\*\*. Correlation is significant at the 0.01 level (2-tailed).

In blue – positive correlations

In red – negative correlations

**Table S3.** Pearson correlations between photosynthetic parameters for Purpuriu variety in the first year.

|                      | ANT             | CCI65            | CCI75           | CCI89         | PAR65            | PAR75        | PAR89        | T <sub>leaf</sub> 65 | T <sub>leaf</sub> 75 | T <sub>leaf</sub> 89 | T <sub>ext</sub> 65 | T <sub>ext</sub> 75 | T <sub>ext</sub> 89 | CO <sub>2</sub> 65 | CO <sub>2</sub> 75 | CO <sub>2</sub> 89 | WUE 65    | WUE 75 | WUE 89 |
|----------------------|-----------------|------------------|-----------------|---------------|------------------|--------------|--------------|----------------------|----------------------|----------------------|---------------------|---------------------|---------------------|--------------------|--------------------|--------------------|-----------|--------|--------|
| ANT                  | 1               |                  |                 |               |                  |              |              |                      |                      |                      |                     |                     |                     |                    |                    |                    |           |        |        |
| CCI65                | 0.621           | 1                |                 |               |                  |              |              |                      |                      |                      |                     |                     |                     |                    |                    |                    |           |        |        |
| CCI75                | 0.678           | 0.997(*)         | 1               |               |                  |              |              |                      |                      |                      |                     |                     |                     |                    |                    |                    |           |        |        |
| CCI89                | -0.546          | -0.996           | -0.986          | 1             |                  |              |              |                      |                      |                      |                     |                     |                     |                    |                    |                    |           |        |        |
| PAR65                | 0.645           | <b>1.000(*)</b>  | 0.999(*)        | -0.992        | 1                |              |              |                      |                      |                      |                     |                     |                     |                    |                    |                    |           |        |        |
| PAR75                | 0.481           | 0.986            | <b>0.970</b>    | -0.997(*)     | 0.980            | 1            |              |                      |                      |                      |                     |                     |                     |                    |                    |                    |           |        |        |
| PAR89                | 0.702           | 0.994            | 0.999(*)        | <b>-0.980</b> | 0.997(*)         | 0.962        | 1            |                      |                      |                      |                     |                     |                     |                    |                    |                    |           |        |        |
| T <sub>leaf</sub> 65 | -0.008          | <b>0.779</b>     | 0.729           | -0.833        | <b>0.759</b>     | 0.873        | 0.706        | 1                    |                      |                      |                     |                     |                     |                    |                    |                    |           |        |        |
| T <sub>leaf</sub> 75 | <b>0.997(*)</b> | 0.680            | <b>0.733</b>    | -0.610        | 0.702            | <b>0.547</b> | 0.755        | 0.069                | 1                    |                      |                     |                     |                     |                    |                    |                    |           |        |        |
| T <sub>leaf</sub> 89 | 0.761           | 0.981            | 0.993           | <b>-0.959</b> | 0.986            | 0.934        | <b>0.996</b> | 0.642                | 0.809                | 1                    |                     |                     |                     |                    |                    |                    |           |        |        |
| T <sub>ext</sub> 65  | 0.297           | <b>-0.564</b>    | -0.500          | 0.637         | <b>-0.538</b>    | -0.694       | -0.471       | <b>-0.957</b>        | 0.223                | -0.392               | 1                   |                     |                     |                    |                    |                    |           |        |        |
| T <sub>ext</sub> 75  | <b>0.999(*)</b> | 0.583            | <b>0.642</b>    | -0.506        | 0.607            | <b>0.438</b> | 0.668        | -0.056               | <b>0.992</b>         | 0.729                | 0.343               | 1                   |                     |                    |                    |                    |           |        |        |
| T <sub>ext</sub> 89  | 0.271           | 0.923            | 0.891           | <b>-0.954</b> | 0.910            | 0.974        | <b>0.875</b> | 0.960                | 0.344                | <b>0.830</b>         | -0.839              | 0.224               | 1                   |                    |                    |                    |           |        |        |
| CO <sub>2</sub> 65   | 0.140           | <b>-0.689</b>    | -0.633          | 0.753         | <b>-0.667</b>    | -0.801       | -0.607       | <b>-0.991</b>        | 0.063                | -0.536               | <b>0.987</b>        | 0.187               | -0.915              | 1                  |                    |                    |           |        |        |
| CO <sub>2</sub> 75   | 0.999(*)        | 0.660            | <b>0.715</b>    | -0.588        | 0.683            | <b>0.525</b> | 0.738        | 0.043                | <b>1.000(*)</b>      | 0.793                | 0.249               | <b>0.995</b>        | 0.319               | 0.089              | 1                  |                    |           |        |        |
| CO <sub>2</sub> 89   | 0.952           | 0.350            | 0.419           | <b>-0.263</b> | 0.379            | 0.188        | <b>0.450</b> | -0.315               | 0.925                | <b>0.525</b>         | 0.577               | 0.965               | -0.038              | 0.437              | 0.935              | 1                  |           |        |        |
| WUE 65               | -0.678          | <b>-0.997(*)</b> | -1.000(**)      | 0.986         | <b>-0.999(*)</b> | -0.970       | -0.999(*)    | <b>-0.729</b>        | -0.733               | -0.993               | <b>0.500</b>        | -0.642              | -0.891              | <b>0.633</b>       | -0.715             | -0.419             | 1         |        |        |
| WUE 75               | 0.722           | 0.991            | <b>0.998(*)</b> | -0.974        | 0.994            | <b>0.954</b> | 1.000(*)     | 0.686                | <b>0.773</b>         | 0.998(*)             | -0.446              | <b>0.688</b>        | 0.862               | -0.585             | <b>0.756</b>       | 0.474              | -0.998(*) | 1      |        |
| WUE 89               | <b>0.881</b>    | 0.918            | 0.945           | <b>-0.877</b> | 0.929            | 0.838        | <b>0.955</b> | 0.465                | 0.915                | <b>0.977</b>         | -0.189              | 0.858               | <b>0.693</b>        | -0.345             | 0.904              | <b>0.693</b>       | -0.945    | 0.963  | 1      |

\*. Correlation is significant at the 0.05 level (2-tailed).

\*\*. Correlation is significant at the 0.01 level (2-tailed).

In blue – positive correlations

In red – negative correlations

**Table S4.** Pearson correlations between photosynthetic parameters for Coarna neagra variety in the first year.

|                      | ANT           | CCI65         | CCI75         | CCI89            | PAR65             | PAR75        | PAR89         | T <sub>leaf</sub> 65 | T <sub>leaf</sub> 75 | T <sub>leaf</sub> 89 | T <sub>ext</sub> 65 | T <sub>ext</sub> 75 | T <sub>ext</sub> 89 | CO <sub>2</sub> 65 | CO <sub>2</sub> 75 | CO <sub>2</sub> 89 | WUE 65 | WUE 75 | WUE 89 |
|----------------------|---------------|---------------|---------------|------------------|-------------------|--------------|---------------|----------------------|----------------------|----------------------|---------------------|---------------------|---------------------|--------------------|--------------------|--------------------|--------|--------|--------|
| ANT                  | 1             |               |               |                  |                   |              |               |                      |                      |                      |                     |                     |                     |                    |                    |                    |        |        |        |
| CCI65                | -0.882        | 1             |               |                  |                   |              |               |                      |                      |                      |                     |                     |                     |                    |                    |                    |        |        |        |
| CCI75                | 0.875         | -1.000(*)     | 1             |                  |                   |              |               |                      |                      |                      |                     |                     |                     |                    |                    |                    |        |        |        |
| CCI89                | 0.857         | -0.999(*)     | 0.999(*)      | 1                |                   |              |               |                      |                      |                      |                     |                     |                     |                    |                    |                    |        |        |        |
| PAR65                | 0.763         | <b>-0.978</b> | 0.981         | 0.987            | 1                 |              |               |                      |                      |                      |                     |                     |                     |                    |                    |                    |        |        |        |
| PAR75                | -0.064        | 0.526         | <b>-0.540</b> | -0.569           | -0.693            | 1            |               |                      |                      |                      |                     |                     |                     |                    |                    |                    |        |        |        |
| PAR89                | -0.345        | 0.746         | -0.757        | <b>-0.779</b>    | -0.870            | 0.959        | 1             |                      |                      |                      |                     |                     |                     |                    |                    |                    |        |        |        |
| T <sub>leaf</sub> 65 | 0.661         | <b>-0.231</b> | 0.215         | 0.181            | 0.021             | 0.706        | 0.476         | 1                    |                      |                      |                     |                     |                     |                    |                    |                    |        |        |        |
| T <sub>leaf</sub> 75 | -0.650        | 0.931         | <b>-0.937</b> | -0.948           | -0.987            | <b>0.800</b> | 0.938         | 0.141                | 1                    |                      |                     |                     |                     |                    |                    |                    |        |        |        |
| T <sub>leaf</sub> 89 | <b>-0.945</b> | 0.988         | -0.985        | <b>-0.979</b>    | -0.933            | 0.387        | <b>0.633</b>  | -0.379               | 0.863                | 1                    |                     |                     |                     |                    |                    |                    |        |        |        |
| T <sub>ext</sub> 65  | -0.132        | 0.583         | -0.596        | -0.624           | <b>-0.741</b>     | 0.998(*)     | 0.976         | <b>0.656</b>         | 0.839                | 0.449                | 1                   |                     |                     |                    |                    |                    |        |        |        |
| T <sub>ext</sub> 75  | -0.929        | 0.994         | <b>-0.992</b> | -0.987           | -0.949            | <b>0.430</b> | 0.669         | -0.336               | <b>0.885</b>         | 0.999(*)             | 0.491               | 1                   |                     |                    |                    |                    |        |        |        |
| T <sub>ext</sub> 89  | <b>0.961</b>  | -0.978        | 0.975         | <b>0.966</b>     | 0.913             | -0.338       | <b>-0.592</b> | 0.427                | -0.835               | <b>-0.999(*)</b>     | -0.402              | -0.995              | 1                   |                    |                    |                    |        |        |        |
| CO <sub>2</sub> 65   | -0.768        | <b>0.979</b>  | -0.982        | -0.988           | <b>-1.000(**)</b> | 0.688        | 0.866         | -0.028               | 0.986                | 0.936                | <b>0.736</b>        | 0.951               | -0.916              | 1                  |                    |                    |        |        |        |
| CO <sub>2</sub> 75   | 0.087         | 0.392         | <b>-0.407</b> | -0.438           | -0.577            | <b>0.989</b> | 0.905         | 0.805                | <b>0.701</b>         | 0.244                | 0.976               | <b>0.289</b>        | -0.193              | 0.571              | 1                  |                    |        |        |        |
| CO <sub>2</sub> 89   | -0.693        | 0.951         | -0.956        | <b>-0.965</b>    | -0.995            | 0.763        | <b>0.915</b>  | 0.082                | 0.998(*)             | <b>0.891</b>         | 0.806               | 0.911               | <b>-0.866</b>       | 0.994              | 0.657              | 1                  |        |        |        |
| WUE 65               | -0.982        | <b>0.955</b>  | -0.950        | -0.939           | <b>-0.872</b>     | 0.251        | 0.516         | <b>-0.508</b>        | 0.782                | 0.990                | <b>0.317</b>        | 0.982               | -0.996              | <b>0.876</b>       | 0.103              | 0.817              | 1      |        |        |
| WUE 75               | -0.988        | 0.799         | <b>-0.789</b> | -0.767           | -0.654            | -0.092       | 0.195         | -0.770               | <b>0.523</b>         | 0.882                | -0.024              | <b>0.860</b>        | -0.906              | 0.660              | <b>-0.241</b>      | 0.573              | 0.941  | 1      |        |
| WUE 89               | -0.822        | 0.993         | -0.995        | <b>-0.998(*)</b> | -0.995            | 0.621        | <b>0.818</b>  | -0.117               | 0.967                | <b>0.963</b>         | 0.673               | 0.975               | <b>-0.948</b>       | 0.996              | 0.496              | <b>0.980</b>       | 0.915  | 0.723  | 1      |

\*. Correlation is significant at the 0.05 level (2-tailed).

\*\*. Correlation is significant at the 0.01 level (2-tailed).

**In blue – positive correlations**

**In red – negative correlations**

**Table S5.** Pearson correlations between photosynthetic parameters for Gelu variety in the second year.

|                      | ANT        | CCI65     | CCI75      | CCI89     | PAR65    | PAR75     | PAR89     | T <sub>leaf</sub> 65 | T <sub>leaf</sub> 75 | T <sub>leaf</sub> 89 | T <sub>ext</sub> 65 | T <sub>ext</sub> 75 | T <sub>ext</sub> 89 | CO <sub>2</sub> 65 | CO <sub>2</sub> 75 | CO <sub>2</sub> 89 | WUE 65 | WUE 75 | WUE 89 |
|----------------------|------------|-----------|------------|-----------|----------|-----------|-----------|----------------------|----------------------|----------------------|---------------------|---------------------|---------------------|--------------------|--------------------|--------------------|--------|--------|--------|
| ANT                  | 1          |           |            |           |          |           |           |                      |                      |                      |                     |                     |                     |                    |                    |                    |        |        |        |
| CCI65                | -0.987     | 1         |            |           |          |           |           |                      |                      |                      |                     |                     |                     |                    |                    |                    |        |        |        |
| CCI75                | 0.979      | -0.999(*) | 1          |           |          |           |           |                      |                      |                      |                     |                     |                     |                    |                    |                    |        |        |        |
| CCI89                | 0.963      | -0.994    | 0.998(*)   | 1         |          |           |           |                      |                      |                      |                     |                     |                     |                    |                    |                    |        |        |        |
| PAR65                | -0.604     | 0.468     | -0.431     | -0.368    | 1        |           |           |                      |                      |                      |                     |                     |                     |                    |                    |                    |        |        |        |
| PAR75                | 0.999(*)   | -0.980    | 0.971      | 0.953     | -0.634   | 1         |           |                      |                      |                      |                     |                     |                     |                    |                    |                    |        |        |        |
| PAR89                | -0.995     | 0.998(*)  | -0.994     | -0.985    | 0.523    | -0.991    | 1         |                      |                      |                      |                     |                     |                     |                    |                    |                    |        |        |        |
| T <sub>leaf</sub> 65 | -0.418     | 0.267     | -0.227     | -0.160    | 0.977    | -0.452    | 0.327     | 1                    |                      |                      |                     |                     |                     |                    |                    |                    |        |        |        |
| T <sub>leaf</sub> 75 | -0.994     | 0.998(*)  | -0.995     | -0.986    | 0.516    | -0.990    | 1.000(**) | 0.319                | 1                    |                      |                     |                     |                     |                    |                    |                    |        |        |        |
| T <sub>leaf</sub> 89 | -0.954     | 0.990     | -0.995     | -0.999(*) | 0.338    | -0.942    | 0.979     | 0.127                | 0.981                | 1                    |                     |                     |                     |                    |                    |                    |        |        |        |
| T <sub>ext</sub> 65  | -0.972     | 0.997(*)  | -0.999(*)  | -0.999(*) | 0.400    | -0.962    | 0.990     | 0.193                | 0.991                | 0.998(*)             | 1                   |                     |                     |                    |                    |                    |        |        |        |
| T <sub>ext</sub> 75  | -0.851     | 0.924     | -0.939     | -0.961    | 0.095    | -0.830    | 0.898     | -0.121               | 0.902                | 0.969                | 0.951               | 1                   |                     |                    |                    |                    |        |        |        |
| T <sub>ext</sub> 89  | 0.450      | -0.588    | 0.621      | 0.673     | 0.440    | 0.416     | -0.536    | 0.623                | -0.543               | -0.697               | -0.648              | -0.852              | 1                   |                    |                    |                    |        |        |        |
| CO <sub>2</sub> 65   | 0.999(*)   | -0.992    | 0.986      | 0.973     | -0.575   | 0.997(*)  | -0.998(*) | -0.385               | -0.998(*)            | -0.964               | -0.980              | -0.869              | 0.482               | 1                  |                    |                    |        |        |        |
| CO <sub>2</sub> 75   | -1.000(**) | 0.986     | -0.979     | -0.962    | 0.607    | -0.999(*) | 0.995     | 0.421                | 0.994                | 0.953                | 0.971               | 0.849               | -0.447              | -0.999(*)          | 1                  |                    |        |        |        |
| CO <sub>2</sub> 89   | -0.982     | 1.000(*)  | -1.000(**) | -0.997    | 0.444    | -0.974    | 0.996     | 0.240                | 0.997                | 0.993                | 0.999(*)            | 0.934               | -0.610              | -0.988             | 0.982              | 1                  |        |        |        |
| WUE 65               | -0.977     | 0.999(*)  | -1.000(**) | -0.998(*) | 0.421    | -0.968    | 0.993     | 0.216                | 0.994                | 0.996                | 1.00(*)             | 0.943               | -0.630              | -0.984             | 0.976              | 1.00(*)            | 1      |        |        |
| WUE 75               | 0.456      | -0.593    | 0.626      | 0.678     | 0.434    | 0.422     | -0.541    | 0.618                | -0.548               | -0.701               | -0.652              | -0.855              | 1.00(**)            | 0.488              | -0.453             | -0.615             | -0.634 | 1      |        |
| WUE 89               | -0.654     | 0.524     | -0.488     | -0.427    | 0.998(*) | -0.682    | 0.577     | 0.961                | 0.569                | 0.397                | 0.458               | 0.159               | 0.381               | -0.626             | 0.656              | 0.500              | 0.478  | 0.376  | 1      |

\*. Correlation is significant at the 0.05 level (2-tailed).

\*\*. Correlation is significant at the 0.01 level (2-tailed).

In blue – positive correlations

In red – negative correlations

**Table S6.** Pearson correlations between photosynthetic parameters for Moldova variety in the second year.

|                      | ANT              | CCI65           | CCI75           | CCI89         | PAR65         | PAR75            | PAR89         | T <sub>leaf</sub> 65 | T <sub>leaf</sub> 75 | T <sub>leaf</sub> 89 | T <sub>ext</sub> 65 | T <sub>ext</sub> 75 | T <sub>ext</sub> 89 | CO <sub>2</sub> 65 | CO <sub>2</sub> 75 | CO <sub>2</sub> 89 | WUE 65 | WUE 75 | WUE 89 |
|----------------------|------------------|-----------------|-----------------|---------------|---------------|------------------|---------------|----------------------|----------------------|----------------------|---------------------|---------------------|---------------------|--------------------|--------------------|--------------------|--------|--------|--------|
| ANT                  | 1                |                 |                 |               |               |                  |               |                      |                      |                      |                     |                     |                     |                    |                    |                    |        |        |        |
| CCI65                | -0.967           | 1               |                 |               |               |                  |               |                      |                      |                      |                     |                     |                     |                    |                    |                    |        |        |        |
| CCI75                | 0.982            | -0.998(*)       | 1               |               |               |                  |               |                      |                      |                      |                     |                     |                     |                    |                    |                    |        |        |        |
| CCI89                | -0.956           | 0.999(*)        | -0.994          | 1             |               |                  |               |                      |                      |                      |                     |                     |                     |                    |                    |                    |        |        |        |
| PAR65                | -0.963           | <b>1.00(**)</b> | -0.997          | 1.000(*)      | 1             |                  |               |                      |                      |                      |                     |                     |                     |                    |                    |                    |        |        |        |
| PAR75                | 0.100            | -0.351          | <b>0.285</b>    | -0.387        | -0.363        | 1                |               |                      |                      |                      |                     |                     |                     |                    |                    |                    |        |        |        |
| PAR89                | -0.727           | 0.879           | -0.843          | <b>0.896</b>  | 0.885         | -0.756           | 1             |                      |                      |                      |                     |                     |                     |                    |                    |                    |        |        |        |
| T <sub>leaf</sub> 65 | 0.992            | <b>-0.992</b>   | .998(*)         | -0.986        | <b>-0.990</b> | 0.228            | -0.810        | 1                    |                      |                      |                     |                     |                     |                    |                    |                    |        |        |        |
| T <sub>leaf</sub> 75 | -0.167           | 0.414           | -0.349          | 0.449         | 0.426         | <b>-0.998(*)</b> | 0.798         | -0.294               | 1                    |                      |                     |                     |                     |                    |                    |                    |        |        |        |
| T <sub>leaf</sub> 89 | <b>-1.000(*)</b> | 0.972           | -0.986          | <b>0.962</b>  | 0.968         | -0.120           | <b>0.741</b>  | -0.994               | 0.187                | 1                    |                     |                     |                     |                    |                    |                    |        |        |        |
| T <sub>ext</sub> 65  | -0.822           | 0.648           | -0.700          | 0.619         | <b>0.639</b>  | 0.485            | 0.206         | <b>-0.741</b>        | -0.425               | 0.810                | 1                   |                     |                     |                    |                    |                    |        |        |        |
| T <sub>ext</sub> 75  | <b>0.980</b>     | -0.998(*)       | <b>1.00(**)</b> | -0.995        | -0.998(*)     | <b>0.297</b>     | -0.850        | 0.997(*)             | <b>-0.361</b>        | -0.984               | -0.691              | 1                   |                     |                    |                    |                    |        |        |        |
| T <sub>ext</sub> 89  | 0.134            | -0.383          | 0.317           | <b>-0.418</b> | -0.395        | 0.999(*)         | <b>-0.778</b> | 0.261                | -0.999(*)            | <b>-0.154</b>        | 0.455               | 0.330               | 1                   |                    |                    |                    |        |        |        |
| CO <sub>2</sub> 65   | 0.998(*)         | <b>-0.982</b>   | 0.993           | -0.974        | <b>-0.980</b> | 0.169            | -0.773        | <b>0.998(*)</b>      | -0.235               | -0.999(*)            | <b>-0.780</b>       | 0.991               | 0.202               | 1                  |                    |                    |        |        |        |
| CO <sub>2</sub> 75   | 0.094            | -0.346          | <b>0.279</b>    | -0.382        | -0.358        | <b>1.00(**)</b>  | -0.752        | 0.222                | <b>-0.997(*)</b>     | -0.114               | 0.490               | <b>0.292</b>        | 0.999(*)            | 0.163              | 1                  |                    |        |        |        |
| CO <sub>2</sub> 89   | <b>-0.978</b>    | 0.999(*)        | -1.000(*)       | <b>0.996</b>  | 0.998(*)      | -0.304           | <b>0.853</b>  | -0.997(*)            | 0.367                | <b>0.982</b>         | 0.686               | -1.000(**)          | <b>-0.336</b>       | -0.990             | -0.298             | 1                  |        |        |        |
| WUE 65               | 0.890            | <b>-0.743</b>   | 0.788           | -0.717        | <b>-0.735</b> | -0.365           | -0.334        | <b>0.823</b>         | 0.301                | -0.881               | <b>-0.991</b>       | 0.780               | -0.333              | <b>0.856</b>       | -0.371             | -0.776             | 1      |        |        |
| WUE 75               | -0.786           | 0.918           | <b>-0.888</b>   | 0.933         | 0.923         | <b>-0.693</b>    | 0.996         | -0.860               | <b>0.741</b>         | 0.799                | 0.294               | <b>-0.894</b>       | -0.717              | -0.827             | <b>-0.689</b>      | 0.897              | -0.418 | 1      |        |
| WUE 89               | <b>-0.982</b>    | 0.901           | -0.930          | <b>0.884</b>  | 0.896         | 0.088            | <b>0.585</b>  | -0.950               | -0.021               | <b>0.978</b>         | 0.914               | -0.925              | 0.055               | -0.967             | 0.095              | <b>0.922</b>       | -0.960 | 0.656  | 1      |

\*. Correlation is significant at the 0.05 level (2-tailed).

\*\*. Correlation is significant at the 0.01 level (2-tailed).

**In blue – positive correlations**

**In red – negative correlations**

**Table S7.** Pearson correlations between photosynthetic parameters for Purpurium variety in the second year.

|                      | ANT              | CCI65            | CCI75         | CCI89         | PAR65         | PAR75        | PAR89         | T <sub>leaf</sub> 65 | T <sub>leaf</sub> 75 | T <sub>leaf</sub> 89 | T <sub>ext</sub> 65 | T <sub>ext</sub> 75 | T <sub>ext</sub> 89 | CO <sub>2</sub> 65 | CO <sub>2</sub> 75 | CO <sub>2</sub> 89 | WUE 65 | WUE 75 | WUE 89 |
|----------------------|------------------|------------------|---------------|---------------|---------------|--------------|---------------|----------------------|----------------------|----------------------|---------------------|---------------------|---------------------|--------------------|--------------------|--------------------|--------|--------|--------|
| ANT                  | 1                |                  |               |               |               |              |               |                      |                      |                      |                     |                     |                     |                    |                    |                    |        |        |        |
| CCI65                | 0.993            | 1                |               |               |               |              |               |                      |                      |                      |                     |                     |                     |                    |                    |                    |        |        |        |
| CCI75                | <b>-0.984</b>    | -0.998(*)        | 1             |               |               |              |               |                      |                      |                      |                     |                     |                     |                    |                    |                    |        |        |        |
| CCI89                | 0.989            | 1.000(*)         | -0.999(*)     | 1             |               |              |               |                      |                      |                      |                     |                     |                     |                    |                    |                    |        |        |        |
| PAR65                | 0.764            | <b>0.684</b>     | -0.636        | 0.661         | 1             |              |               |                      |                      |                      |                     |                     |                     |                    |                    |                    |        |        |        |
| PAR75                | 0.097            | -0.019           | <b>0.083</b>  | -0.049        | 0.717         | 1            |               |                      |                      |                      |                     |                     |                     |                    |                    |                    |        |        |        |
| PAR89                | 0.780            | 0.702            | -0.655        | <b>0.680</b>  | 1.000(*)      | 0.699        | 1             |                      |                      |                      |                     |                     |                     |                    |                    |                    |        |        |        |
| T <sub>leaf</sub> 65 | -0.252           | <b>-0.362</b>    | 0.421         | -0.390        | <b>0.432</b>  | 0.939        | 0.410         | 1                    |                      |                      |                     |                     |                     |                    |                    |                    |        |        |        |
| T <sub>leaf</sub> 75 | 0.614            | 0.519            | <b>-0.463</b> | 0.493         | 0.979         | <b>0.845</b> | 0.973         | 0.609                | 1                    |                      |                     |                     |                     |                    |                    |                    |        |        |        |
| T <sub>leaf</sub> 89 | -0.320           | -0.428           | 0.485         | <b>-0.455</b> | 0.367         | 0.912        | <b>0.344</b>  | 0.997(*)             | 0.551                | 1                    |                     |                     |                     |                    |                    |                    |        |        |        |
| T <sub>ext</sub> 65  | 0.951            | <b>0.980</b>     | -0.991        | 0.986         | <b>0.526</b>  | -0.217       | 0.547         | <b>-0.540</b>        | 0.339                | -0.598               | 1                   |                     |                     |                    |                    |                    |        |        |        |
| T <sub>ext</sub> 75  | -0.907           | -0.950           | <b>0.968</b>  | -0.959        | -0.421        | 0.331        | -0.444        | 0.636                | -0.225               | 0.689                | -0.993              | 1                   |                     |                    |                    |                    |        |        |        |
| T <sub>ext</sub> 89  | -0.508           | -0.605           | 0.655         | <b>-0.629</b> | 0.168         | 0.808        | 0.143         | 0.961                | 0.367                | <b>0.979</b>         | -0.751              | 0.823               | 1                   |                    |                    |                    |        |        |        |
| CO <sub>2</sub> 65   | 0.625            | <b>0.530</b>     | -0.475        | 0.505         | <b>0.981</b>  | 0.837        | 0.976         | <b>0.598</b>         | 1.000(**)            | 0.539                | <b>0.352</b>        | -0.239              | 0.354               | 1                  |                    |                    |        |        |        |
| CO <sub>2</sub> 75   | -0.036           | -0.152           | <b>0.215</b>  | -0.181        | 0.618         | <b>0.991</b> | 0.598         | 0.976                | <b>0.766</b>         | 0.958                | -0.344              | <b>0.453</b>        | 0.879               | 0.757              | 1                  |                    |        |        |        |
| CO <sub>2</sub> 89   | <b>0.999(*)</b>  | 0.986            | -0.973        | <b>0.980</b>  | 0.797         | 0.150        | <b>0.812</b>  | -0.200               | 0.655                | -0.269               | 0.933               | -0.884              | <b>-0.462</b>       | 0.666              | 0.017              | 1                  |        |        |        |
| WUE 65               | <b>-0.999(*)</b> | <b>-0.998(*)</b> | 0.991         | -0.995        | <b>-0.732</b> | -0.049       | -0.749        | <b>0.298</b>         | -0.576               | 0.365                | <b>-0.964</b>       | 0.926               | 0.549               | <b>-0.587</b>      | 0.084              | -0.995             | 1      |        |        |
| WUE 75               | 0.809            | 0.736            | <b>-0.691</b> | 0.715         | 0.997(*)      | <b>0.663</b> | 0.999(*)      | 0.364                | <b>0.961</b>         | 0.297                | 0.587               | <b>-0.487</b>       | 0.094               | 0.964              | <b>0.558</b>       | 0.839              | -0.780 | 1      |        |
| WUE 89               | 0.062            | 0.178            | -0.240        | <b>0.207</b>  | -0.597        | -0.987       | <b>-0.577</b> | -0.982               | -0.749               | <b>-0.965</b>        | 0.369               | -0.476              | <b>-0.891</b>       | -0.740             | -1.000(*)          | 0.009              | -0.110 | -0.536 | 1      |

\*. Correlation is significant at the 0.05 level (2-tailed).

\*\*. Correlation is significant at the 0.01 level (2-tailed).

**In blue – positive correlations**

**In red – negative correlations**

**Table S8.** Pearson correlations between photosynthetic parameters for Coarna neagra variety in the second year.

|                      | ANT       | CCI65  | CCI75     | CCI89     | PAR65  | PAR75  | PAR89    | T <sub>leaf</sub> 65 | T <sub>leaf</sub> 75 | T <sub>leaf</sub> 89 | T <sub>ext</sub> 65 | T <sub>ext</sub> 75 | T <sub>ext</sub> 89 | CO <sub>2</sub> 65 | CO <sub>2</sub> 75 | CO <sub>2</sub> 89 | WUE 65 | WUE 75 | WUE 89 |
|----------------------|-----------|--------|-----------|-----------|--------|--------|----------|----------------------|----------------------|----------------------|---------------------|---------------------|---------------------|--------------------|--------------------|--------------------|--------|--------|--------|
| ANT                  | 1         |        |           |           |        |        |          |                      |                      |                      |                     |                     |                     |                    |                    |                    |        |        |        |
| CCI65                | -0.995    | 1      |           |           |        |        |          |                      |                      |                      |                     |                     |                     |                    |                    |                    |        |        |        |
| CCI75                | 0.100     | 0.000  | 1         |           |        |        |          |                      |                      |                      |                     |                     |                     |                    |                    |                    |        |        |        |
| CCI89                | 0.100     | 0.000  | 1.000(**) | 1         |        |        |          |                      |                      |                      |                     |                     |                     |                    |                    |                    |        |        |        |
| PAR65                | 0.426     | -0.333 | 0.943     | 0.943     | 1      |        |          |                      |                      |                      |                     |                     |                     |                    |                    |                    |        |        |        |
| PAR75                | 0.977     | -0.993 | -0.116    | -0.116    | 0.222  | 1      |          |                      |                      |                      |                     |                     |                     |                    |                    |                    |        |        |        |
| PAR89                | -0.886    | 0.836  | -0.549    | -0.549    | -0.796 | -0.766 | 1        |                      |                      |                      |                     |                     |                     |                    |                    |                    |        |        |        |
| T <sub>leaf</sub> 65 | -0.937    | 0.967  | 0.254     | 0.254     | -0.083 | -0.990 | 0.669    | 1                    |                      |                      |                     |                     |                     |                    |                    |                    |        |        |        |
| T <sub>leaf</sub> 75 | -0.913    | 0.949  | 0.316     | 0.316     | -0.019 | -0.979 | 0.620    | 0.998(*)             | 1                    |                      |                     |                     |                     |                    |                    |                    |        |        |        |
| T <sub>leaf</sub> 89 | -0.904    | 0.857  | -0.516    | -0.516    | -0.772 | -0.791 | 0.999(*) | 0.698                | 0.650                | 1                    |                     |                     |                     |                    |                    |                    |        |        |        |
| T <sub>ext</sub> 65  | -0.579    | 0.495  | -0.869    | -0.869    | -0.984 | -0.391 | 0.891    | 0.258                | 0.196                | 0.872                | 1                   |                     |                     |                    |                    |                    |        |        |        |
| T <sub>ext</sub> 75  | 0.091     | 0.008  | 1.000(**) | 1.000(**) | 0.940  | -0.124 | -0.542   | 0.262                | 0.323                | -0.509               | -0.865              | 1                   |                     |                    |                    |                    |        |        |        |
| T <sub>ext</sub> 89  | -0.056    | 0.156  | 0.988     | 0.988     | 0.879  | -0.269 | -0.412   | 0.401                | 0.459                | -0.377               | -0.781              | 0.989               | 1                   |                    |                    |                    |        |        |        |
| CO <sub>2</sub> 65   | -0.906    | 0.859  | -0.512    | -0.512    | -0.769 | -0.794 | 0.999(*) | 0.701                | 0.654                | 1.000(**)            | 0.870               | -0.505              | -0.372              | 1                  |                    |                    |        |        |        |
| CO <sub>2</sub> 75   | 0.044     | 0.055  | 0.998(*)  | 0.998(*)  | 0.923  | -0.171 | -0.502   | 0.307                | 0.368                | -0.468               | -0.840              | 0.999(*)            | 0.995               | -0.464             | 1                  |                    |        |        |        |
| CO <sub>2</sub> 89   | 0.296     | -0.200 | 0.980     | 0.980     | 0.990  | 0.085  | -0.705   | 0.056                | 0.120                | -0.677               | -0.950              | 0.978               | 0.937               | -0.673             | 0.967              | 1                  |        |        |        |
| WUE 65               | -0.615    | 0.533  | -0.846    | -0.846    | -0.975 | -0.431 | 0.910    | 0.301                | 0.239                | 0.893                | 0.999(*)            | -0.842              | -0.753              | 0.891              | -0.815             | -0.936             | 1      |        |        |
| WUE 75               | -0.998(*) | 0.987  | -0.161    | -0.161    | -0.481 | -0.962 | 0.913    | 0.914                | 0.886                | 0.929                | 0.629               | -0.153              | -0.006              | 0.930              | -0.106             | -0.355             | 0.662  | 1      |        |
| WUE 89               | -0.857    | 0.904  | 0.427     | 0.427     | 0.101  | -0.948 | 0.521    | 0.983                | 0.993                | 0.554                | 0.077               | 0.435               | 0.563               | 0.558              | 0.476              | 0.238              | 0.120  | 0.823  | 1      |

\*. Correlation is significant at the 0.05 level (2-tailed).

\*\*. Correlation is significant at the 0.01 level (2-tailed).

In blue – positive correlations

In red – negative correlations
